# Supplementary material for: Devil in the details: how can we avoid potential pitfalls of CATS regression when our data do not follow a Poisson distribution?
Source: PeerJ journal article supplement (doi:10.7717/peerj.12763), 2022-01-14
Supplement: Appendix1.pdf [file Appendix1.pdf]

## Appendix 2: Kullback-Leibler $R^2$ for members of exponential family

The following table summarizes the formulas of log-likelihood and Kullback-Leibler divergences, supposing that only location parameter ( $\mu$ ) is estimated, the scale parameter is known a priori (if it exists).

| Distribution                     | Log-likelihood                                                                                                                                                                                                                                       | Kullback-Leibler divergence                                                                                                                                                                                                                                                                    |
|----------------------------------|------------------------------------------------------------------------------------------------------------------------------------------------------------------------------------------------------------------------------------------------------|------------------------------------------------------------------------------------------------------------------------------------------------------------------------------------------------------------------------------------------------------------------------------------------------|
| Gaussian (Normal)                | $-n \ln(\sigma\sqrt{2\pi}) - \sum_{i=1}^S \frac{(y_i - \mu_i)^2}{2\sigma^2}$                                                                                                                                                                         | $2 \sum_{i=1}^S \frac{(y_i - \mu_i)^2}{2\sigma^2}$                                                                                                                                                                                                                                             |
| Poisson                          | $\sum_i [y_i \ln(\mu_i) - \mu_i - \ln(y_i!)]$                                                                                                                                                                                                        | $2 \sum_{i=1}^S y_i \ln\left(\frac{y_i}{\mu_i}\right)$                                                                                                                                                                                                                                         |
| Binomial                         | $\sum_i \ln \binom{n}{y_i} + y_i \ln \frac{\mu_i}{n} + (n - y_i) \ln \frac{n - \mu_i}{n}$                                                                                                                                                            | $2 \sum_i y_i \ln \frac{y_i}{\mu_i} + (n - y_i) \ln \frac{n - y_i}{n - \mu_i}$                                                                                                                                                                                                                 |
| Negative binomial                | $\sum_{i=1}^S \ln \frac{\Gamma(y_i + \theta)}{\Gamma(\theta) y_i!} - (y_i + \theta) \ln \left( \frac{\mu_i + \theta}{\theta} \right) + y_i \ln \frac{\mu_i}{\theta}$                                                                                 | $2 \sum_{i=1}^S (y_i + \theta) \ln \left( \frac{\mu_i + \theta}{y_i + \theta} \right) + y_i \ln \frac{y_i}{\mu_i}$                                                                                                                                                                             |
| Zero-truncated Poisson           | $\sum_i [y_i \ln(\mu_i) - \mu_i - \ln(y_i!) - \ln(1 - e^{-\mu_i})]$                                                                                                                                                                                  | $2 \sum_i \left[ y_i \ln \left( \frac{\mu_i^{full}}{\mu_i} \right) - \mu_i^{full} + \mu_i - \ln \left( \frac{1 - \exp(-\mu_i)}{1 - \exp(-\mu_i^{full})} \right) \right]$                                                                                                                       |
| Zero-truncated negative binomial | $\sum_{i=1}^S \ln \frac{\Gamma(y_i + \theta)}{\Gamma(\theta) y_i!} - (y_i + \theta) \ln \left( \frac{\mu_i + \theta}{\theta} \right) + y_i \ln \frac{\mu_i}{\theta} - \ln \left( 1 - \left( \frac{\mu_i + \theta}{\theta} \right)^{-\theta} \right)$ | $2 \sum_{i=1}^S (y_i + \theta) \ln \left( \frac{\mu_i + \theta}{\mu_i^{full} + \theta} \right) + y_i \ln \frac{\mu_i^{full}}{\mu_i} + \ln \left[ \frac{1 - \left( \frac{\mu_i + \theta}{\theta} \right)^{-\theta}}{1 - \left( \frac{\mu_i^{full} + \theta}{\theta} \right)^{-\theta}} \right]$ |

Note that:

- In the case of binomial distribution: instead of usual parametrization (i.e.,  $n$  = number of trials and  $p$  = probability of success) the parameters are  $n$  = number of trials, and  $\mu = np$  = expected number of successes.  $n$  is assumed to be known a priori.
- Parameters of negative binomial distribution are mean ( $\mu$ ) and dispersion ( $\theta$ ). Variance is  $V = \mu + \frac{\mu^2}{\theta}$ . Dispersion is known a priori or value estimated by fitting the studied model is used.
- In deduction of KL-divergence of Poisson distribution we used the fact that for models containing intercept and using the canonical log-link  $\sum \mu_i = \sum y_i$
- $\mu_i^{full}$  can be got by solving the  $y_i = \frac{\mu_i^{full}}{1 - \exp(-\mu_i^{full})}$  or  $y_i = \frac{\mu_i^{full}}{1 - \left( \frac{\mu_i^{full} + \theta}{\theta} \right)^{-\theta}}$  equations for zero-truncated Poisson and negative binomial distributions, respectively.

When canonical link is applied the predicted value of intercept-only model ( $\mu^0$ ) is equal to mean of values ( $\bar{y}$ ). Thus in this case

$$R_{KL}^2 = 1 - \frac{\sum_{i=1}^n (y_i - \mu_i)^2}{\sum_{i=1}^n (y_i - \bar{y})^2}$$

for Gaussian (normal) distribution,

$$R_{KL}^2 = 1 - \frac{\sum_{i=1}^s y_i \ln \left( \frac{y_i}{\mu_i} \right)}{\sum_{i=1}^s y_i \ln \left( \frac{y_i}{\bar{y}} \right)}$$

for Poisson distribution,

$$R_{KL}^2 = 1 - \frac{\sum_i y_i \ln \frac{y_i}{\mu_i} + (n - y_i) \ln \frac{n - y_i}{n - \mu_i}}{\sum_i y_i \ln \frac{y_i}{\bar{y}} + (n - y_i) \ln \frac{n - y_i}{n - \bar{y}}}$$

for binomial distribution, and

$$R_{KL}^2 = 1 - \frac{\sum_{i=1}^s (y_i + \theta) \ln \left( \frac{\mu_i + \theta}{y_i + \theta} \right) + y_i \ln \frac{y_i}{\mu_i}}{\sum_{i=1}^s (y_i + \theta) \ln \left( \frac{\bar{y} + \theta}{y_i + \theta} \right) + y_i \ln \frac{y_i}{\bar{y}}}$$

for negative binomial distribution.

In the two-stage models, the expected value of  $y_i$  depends on two parameters: the probability of presence ( $p$ ) and expected value if  $y_i$  is positive ( $\mu$ ). In contrast to dispersion or power parameters, we cannot assume that the value of  $p$  is known a priori; it is always estimated from the data and often depends on the independent variables. Therefore, it has to be included in the general form of the log-likelihood function:

$$l(\mathbf{p}, \boldsymbol{\mu}; \mathbf{y}) = \sum_{i=1}^s (1 - y_i^+) \ln(1 - p_i) + y_i^+ \ln p_i + \sum_{y_i > 0} \ln f^+(y_i; \mu_i) \quad (1)$$

where  $f^+(y_i; \mu_i)$  is the density function of the distribution fitted to positive data, and  $y_i^+$  is the presence/absence of species

$$y_i^+ = \begin{cases} 1 & \text{if } y_i > 0 \\ 0 & \text{otherwise} \end{cases}$$

Since the likelihood depends on both  $\mathbf{p}$  and  $\boldsymbol{\mu}$ , the definition of  $R^2$  given in equation (20) of the main text should be replaced by:

$$R_{KL}^2 = 1 - \frac{l(\mathbf{p}^{\text{full}}, \boldsymbol{\mu}^{\text{full}}; \mathbf{y}) - l(\mathbf{p}, \boldsymbol{\mu}; \mathbf{y})}{l(\mathbf{p}^{\text{full}}, \boldsymbol{\mu}^{\text{full}}; \mathbf{y}) - l(\mathbf{p}^0, \boldsymbol{\mu}^0; \mathbf{y})} \quad (2)$$

where  $l(\mathbf{p}^{\text{full}}, \boldsymbol{\mu}^{\text{full}}; \mathbf{y})$  and  $l(\mathbf{p}^0, \boldsymbol{\mu}^0; \mathbf{y})$  are log-likelihoods of the full and intercept-only models, respectively. Intercept-only models mean that only intercepts are used as predictors in both stages.

Two-stage models can be fitted as two separate GLMs. Let us denote the likelihood of the two fitted models by  $l(\mathbf{p}; \mathbf{y})$  and  $l(\boldsymbol{\mu}; \mathbf{y})$ . It can be shown that:

$$l(\mathbf{p}, \boldsymbol{\mu}; \mathbf{y}) = l(\mathbf{p}; \mathbf{y}) + l(\boldsymbol{\mu}; \mathbf{y}) \quad (3)$$

In a full model, the predicted and observed values are the same, so  $l(\mathbf{p}^{\text{full}}; \mathbf{y}) = 0$  and  $l(\mathbf{p}^{\text{full}}, \boldsymbol{\mu}^{\text{full}}; \mathbf{y}) = l(\boldsymbol{\mu}^{\text{full}}; \mathbf{y})$ .

Positive abundances can be modeled by beta, zero-truncated Poisson, and zero-truncated negative binomial distributions. In the case of a beta distribution,  $\ln f^+(y_i; \mu_i)$  is the log-likelihood of a beta distribution fitted for positive abundances (see Table 1 for formula). In beta regression, the formula given in Table 1 can be used for calculating  $l(\boldsymbol{\mu}; \mathbf{y})$ . Since the predicted value of the intercept-only model may differ from the mean of observed values, it has to be fitted before calculation of  $l(\boldsymbol{\mu}^0; \mathbf{y})$ .

In the case of zero-truncated Poisson and zero-truncated negative binomial distributions,

$$f^+(y_i; \mu_i) = \frac{f(y_i; \mu_i)}{1 - f(0; \mu_i)} \quad (4)$$

where  $f(y_i; \mu_i)$  is the density of Poisson or negative binomial distributions. In truncated distributions, the expected value is a nonlinear function of  $\mu$ :

$$E(y|y > 0, \mu) = \frac{\mu}{1 - f(0; \mu)} \quad (5)$$

where  $f(0; \mu_i) = e^{-\mu}$  for a zero-truncated Poisson distribution and  $f(0; \mu_i) = (1 + \mu/\theta)^{-\theta}$  for a zero-truncated negative binomial distribution. Therefore, for the calculation of  $l(\mathbf{p}^0, \mathbf{\mu}^0; \mathbf{y})$ , the intercept-only model should be fitted. If the dispersion parameter ( $\phi$  or  $\theta$  in beta or negative binomial model, respectively) is estimated during regression, the estimated value should be used in calculation of the log-likelihood for full and intercept-only models.
