# Supplementary material for: Devil in the details: how can we avoid potential pitfalls of CATS regression when our data do not follow a Poisson distribution?
Source: PeerJ journal article supplement (doi:10.7717/peerj.12763), 2022-01-14
Supplement: Appendix_2.pdf [file Appendix_2.pdf]

## Appendix 2 Equivalence with formula from Shipley (2014)

For a Poisson model without offset, the Kullback-Leibler  $R^2$  is (Table 1):

$$R_{KL}^2 = 1 - \frac{\sum_{i=1}^s y_i \ln\left(\frac{y_i}{\mu_i}\right)}{\sum_{i=1}^s y_i \ln\left(\frac{y_i}{\bar{y}}\right)} \quad (1)$$

It can be re-written in the form of equation (4) from Shipley (2014) using the observed and expected relative abundance ( $o_i = y_i/y_{tot}$  and  $p_i = \mu_i/y_{tot}$ , respectively) and number of species:

$$R_{KL}^2 = 1 - \frac{\sum_{i=1}^s \frac{y_i}{y_{tot}} \ln\left(\frac{y_i/y_{tot}}{\mu_i/y_{tot}}\right)}{\sum_{i=1}^s \frac{y_i}{y_{tot}} \ln\left(\frac{y_i/y_{tot}}{\bar{y}/y_{tot}}\right)} = 1 - \frac{\sum_{i=1}^s o_i \ln\left(\frac{o_i}{p_i}\right)}{\sum_{i=1}^s o_i \ln\left(\frac{o_i}{1/S}\right)} \quad (2)$$
